# Supplementary material for: Development and Validation of a Gas Chromatography–Mass Spectrometry Method for the Analysis of the Novel Plant-Based Substance with Antimicrobial Activity
Source: MDPI journal article supplement (doi:10.3390/antibiotics12101558), 2023-10-22
Supplement: s1 [file s1]

**Table S1.** Results of linearity of the GC–MS assay for 1,8-cineole, terpinen-4-ol, and (-)- $\alpha$ -bisabolol.

| Content from standardized value, % | Concentration of the standard solution of 1,8-cineole, weight % | Concentration of the standard solution of terpinen-4-ol, weight % | Concentration of the standard solution of (-)- $\alpha$ -bisabolol, weight % | Analytical response for each component (peak area) |
|------------------------------------|-----------------------------------------------------------------|-------------------------------------------------------------------|------------------------------------------------------------------------------|----------------------------------------------------|
| 0<br>(Blank)                       | 0                                                               | 0                                                                 | 0                                                                            | 0<br>0<br>0                                        |
| 0.01                               | 0.0005                                                          | 0.00015                                                           | 0.0005                                                                       | 76950<br>38594<br>56910                            |
| 0.02                               | 0.001                                                           | 0.0003                                                            | 0.001                                                                        | 160758<br>79454<br>109763                          |
| 0.05                               | 0.0025                                                          | 0.00075                                                           | 0.0025                                                                       | 388469<br>194984<br>247406                         |
| 0.1                                | 0.005                                                           | 0.0015                                                            | 0.005                                                                        | 731154<br>361610<br>466716                         |
| 0.2                                | 0.01                                                            | 0.003                                                             | 0.01                                                                         | 1397723<br>708694<br>924232                        |
| 0.5                                | 0.025                                                           | 0.0075                                                            | 0.025                                                                        | 3390676<br>1849925<br>2352327                      |

**Table S2.** The linear functions for 1,8-cineole, terpinen-4-ol, and (-)- $\alpha$ -bisabolol standard solutions.

| Compound                 | R <sup>2</sup> | Linear function                     |
|--------------------------|----------------|-------------------------------------|
| 1,8-cineole              | 0.999          | $Y = 1.367265 \times 10^8 \times X$ |
| Terpinen-4-ol            | 0.999          | $Y = 2.452336 \times 10^8 \times X$ |
| (-)- $\alpha$ -bisabolol | 0.999          | $Y = 9.391526 \times 10^7 \times X$ |
